# Supplementary material for: The role of terminal coordinated amides in a series of Ca-tatb frameworks: pore size regulation and fluorescence sensing tunability
Source: Royal Society of Chemistry journal article supplement (doi:10.1039/d3tc03053a), 2023-01-01
Supplement: d3tc03053a1.pdf [file d3tc03053a1.pdf]

Electronic Supporting Information (ESI) for

**The role of terminal coordinated amides in a series of Ca-tatb  
frameworks: pore size regulation and fluorescence sensing tunability**

Bin Tan,<sup>a</sup> Xiu-Ze Hei,<sup>b</sup> Yang-Peng Lin,<sup>c</sup> Zhao-Feng Wu,<sup>a,\*</sup> and Xiao-Ying Huang<sup>a,\*</sup>

<sup>a</sup> State Key Laboratory of Structural Chemistry, Fujian Institute of Research on the Structure of Matter, the Chinese Academy of Sciences, Fuzhou, Fujian, 350002, P.R. China

<sup>b</sup> Hoffmann Institute of Advanced Materials, Shenzhen Polytechnic, 7098 Liuxian Blvd, Nanshan District, Shenzhen 518055, China

<sup>c</sup> Xiamen Institute of Environmental Science, Xiamen, 361021, China

Corresponding E-mail: zfwu@fjirsm.ac.cn; xyhuang@fjirsm.ac.cn

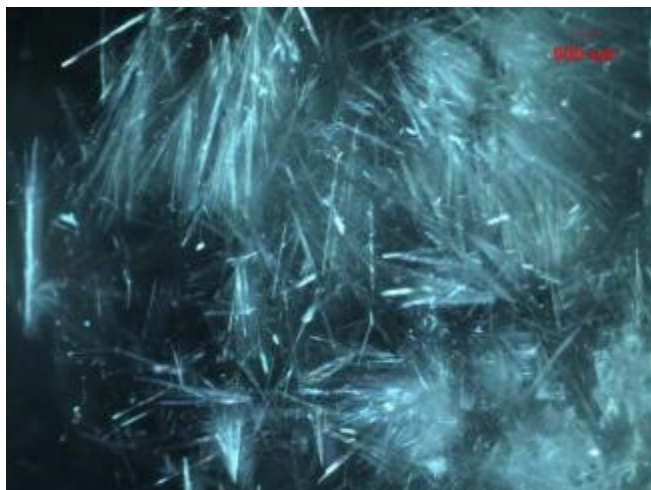

**Figure S1** The crystal image of the as-made compound 1.

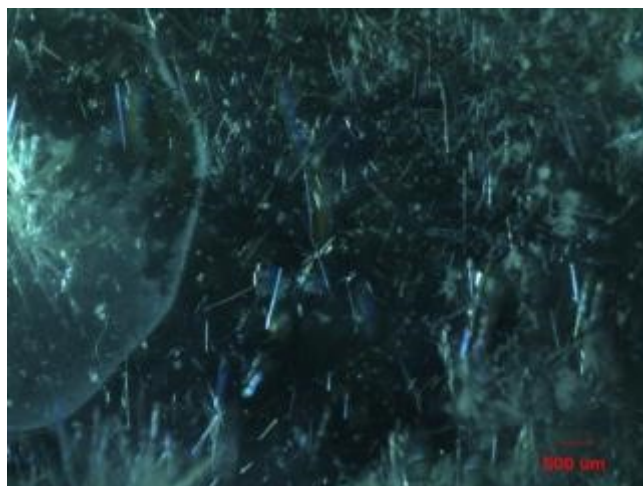

**Figure S2** The crystal image of the as-made compound 2.

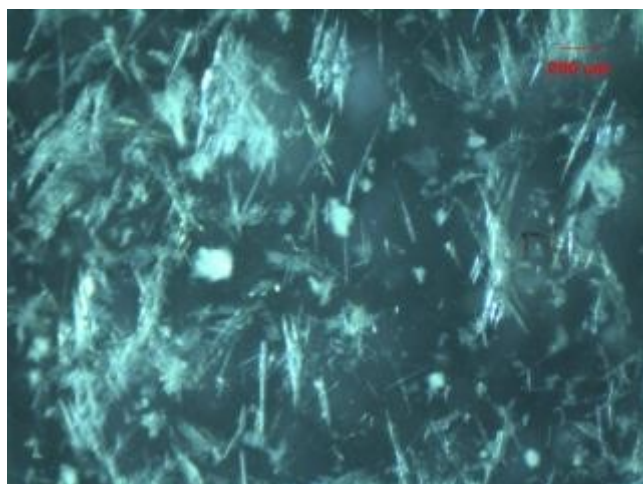

**Figure S3** The crystal image of the as-made compound 3.

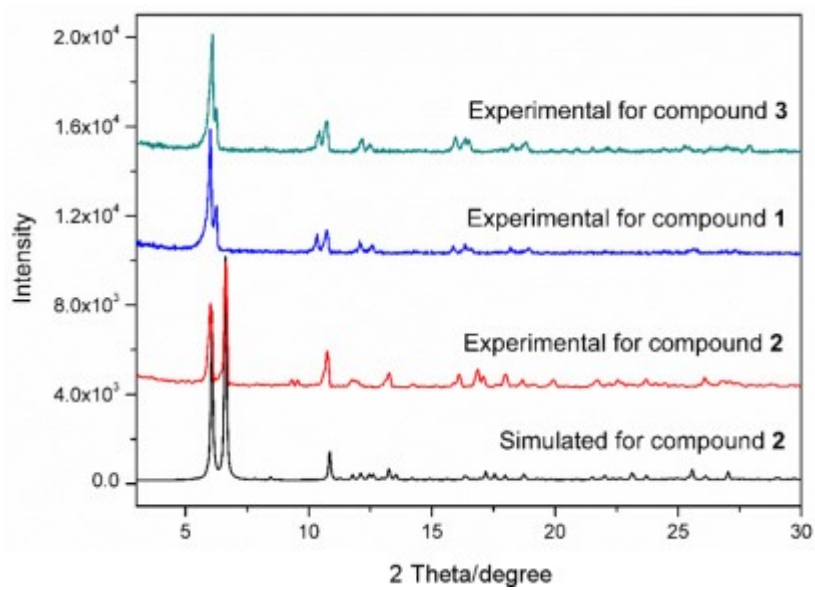

**Figure S4** PXRD patterns of the as-made compounds **1**, **2** and **3**. Simulated PXRD pattern of compound **2** is included for comparison.

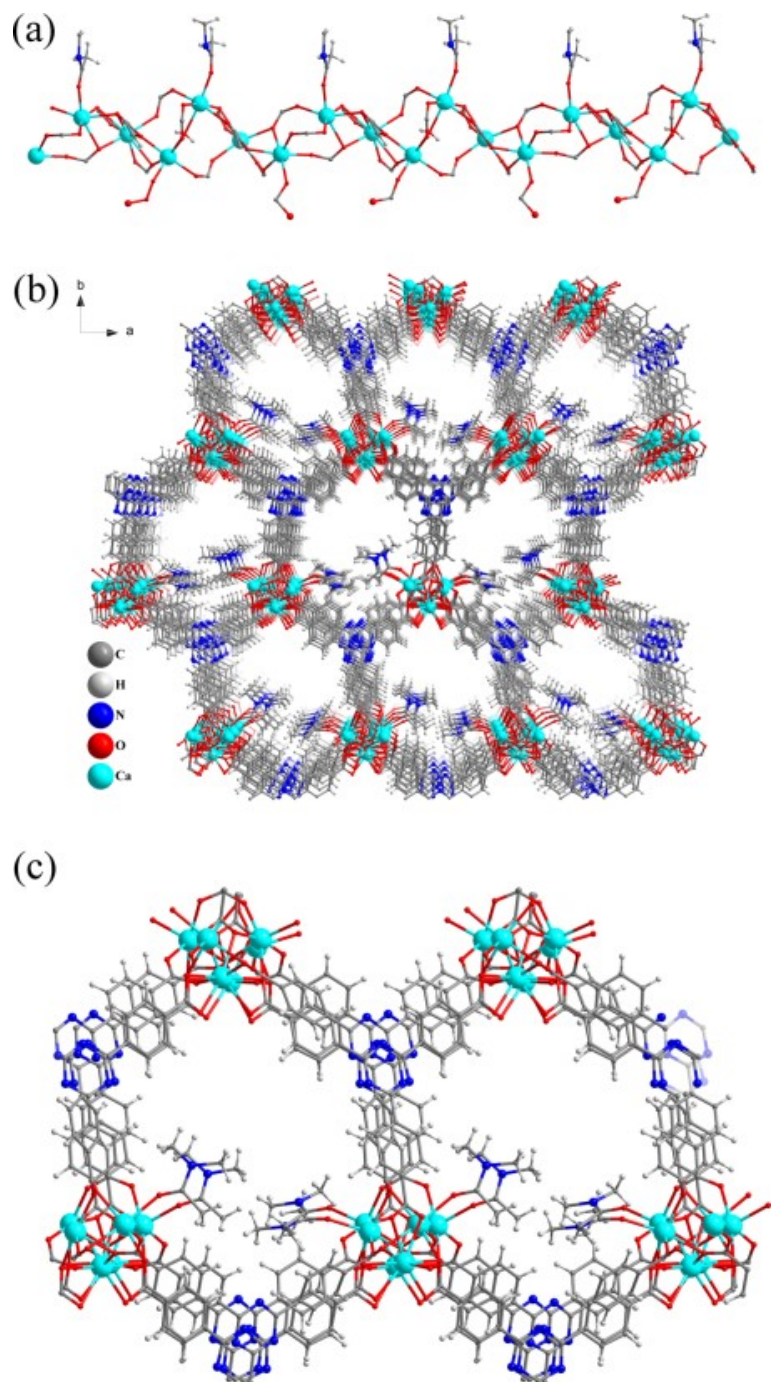

**Figure S5** (a) The 1D chain-like SBU in compound **2** with the coordination environment of Ca<sup>2+</sup>. (b) The 3D structure of compound **2** containing DMA solvents viewed along the *a* axis. (c) The channel environment in zoom in mode. The structure figures are depicted according to the single crystal data reported in *Inorg. Chim. Acta*, 2018, **478**, 8.

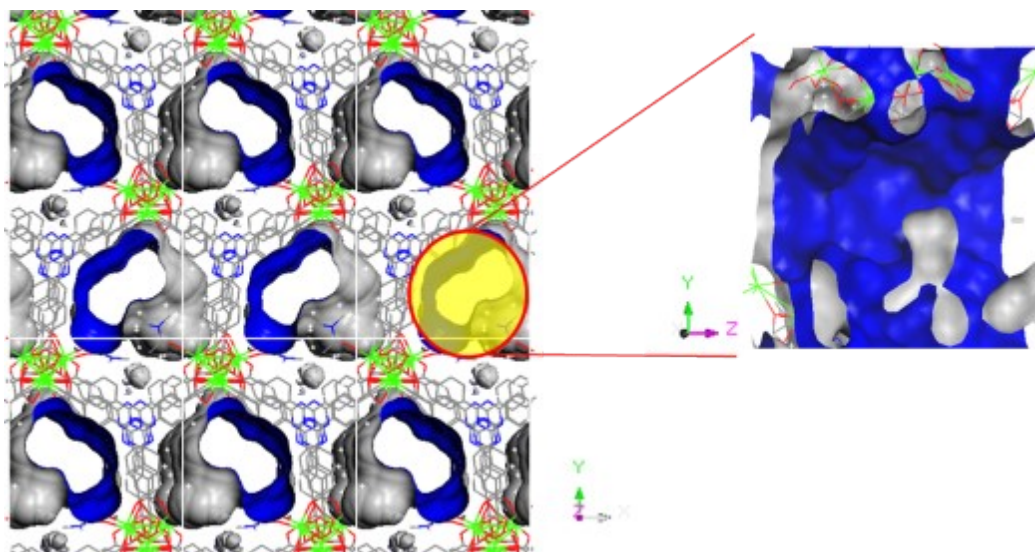

**Figure S6** The channel structure of compound **2** that depicted by Material Studio.

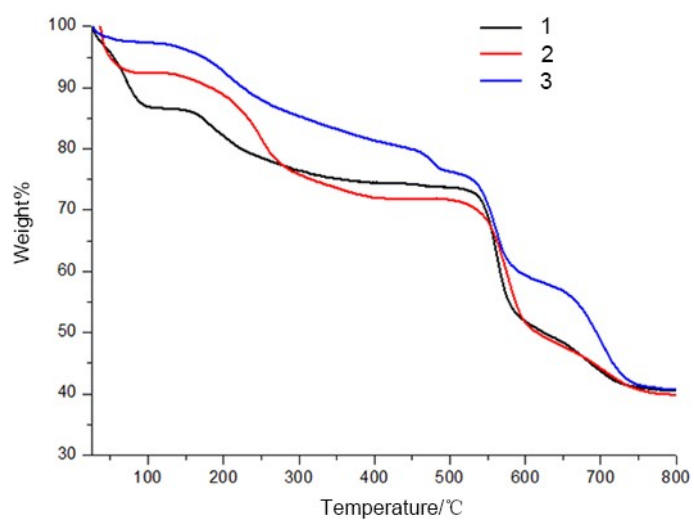

**Figure S7** TG curve for the as-made compounds **1**, **2** and **3**.

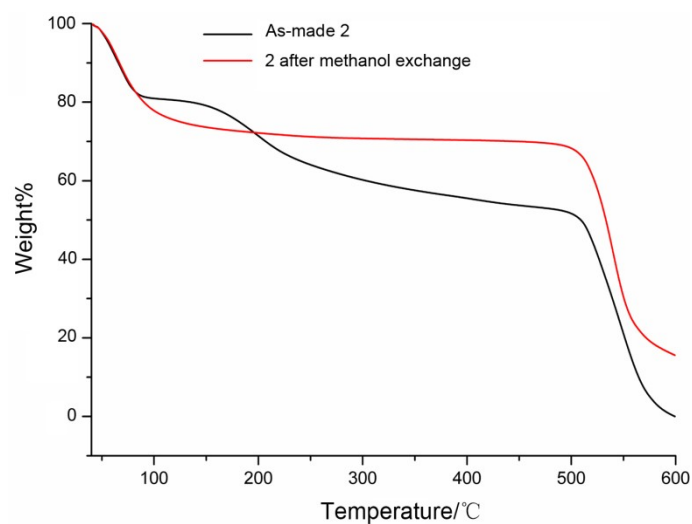

**Figure S8** TG curve for compound **2** before and after solvent exchange.

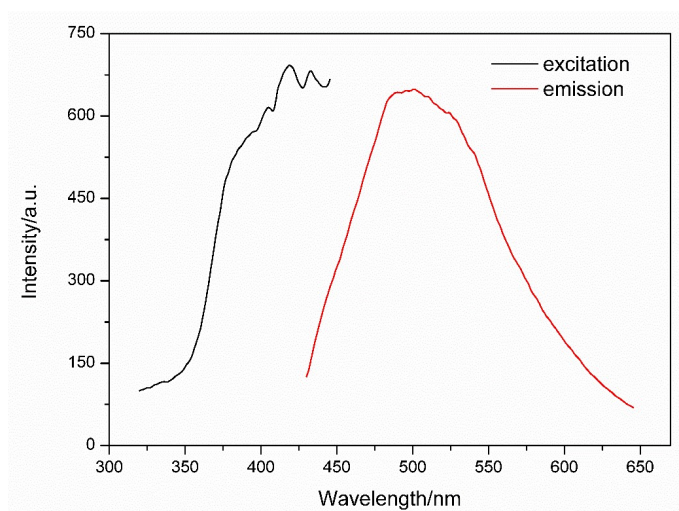

**Figure S9** The excitation and emission spectra of H<sub>4</sub>tatb ligand at solid state measured at room temperature ( $\lambda_{\text{ex}} = 410$  nm and  $\lambda_{\text{em}} = 490$  nm).

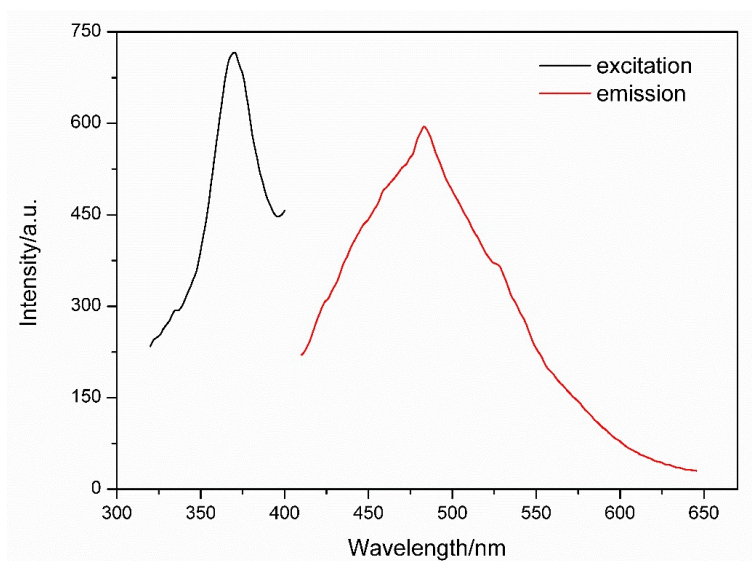

**Figure S10** The excitation and emission spectra of compound **1** at solid state measured at room temperature ( $\lambda_{\text{ex}} = 370$  nm and  $\lambda_{\text{em}} = 480$  nm).

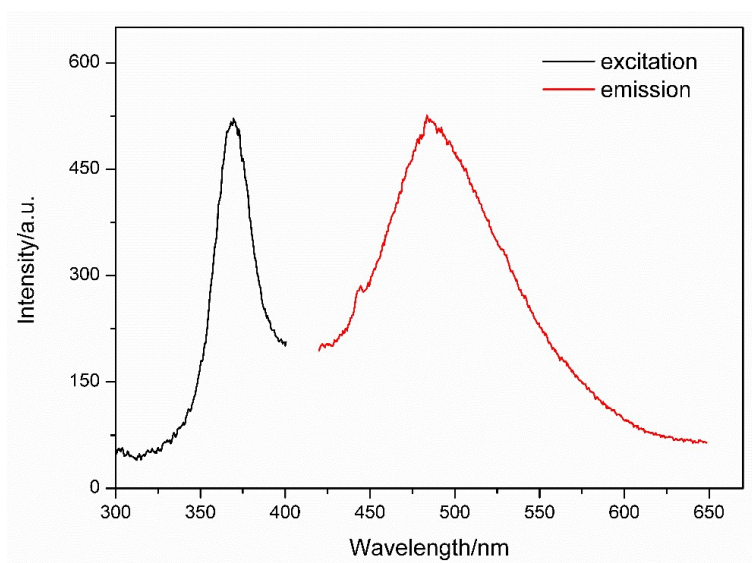

**Figure S11** The excitation and emission spectra of compound **2** at solid state measured at room temperature ( $\lambda_{\text{ex}} = 370$  nm and  $\lambda_{\text{em}} = 480$  nm).

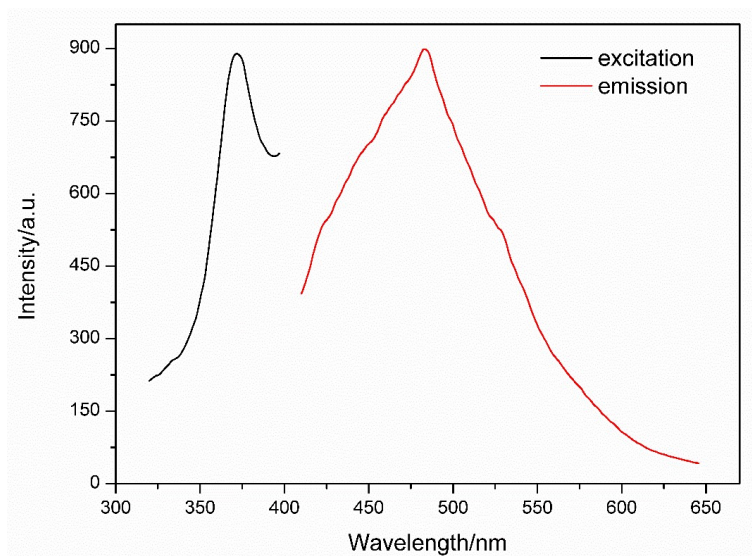

**Figure S12** The excitation and emission spectra of compound **3** at solid state measured at room temperature ( $\lambda_{\text{ex}} = 370 \text{ nm}$  and  $\lambda_{\text{em}} = 480 \text{ nm}$ ).

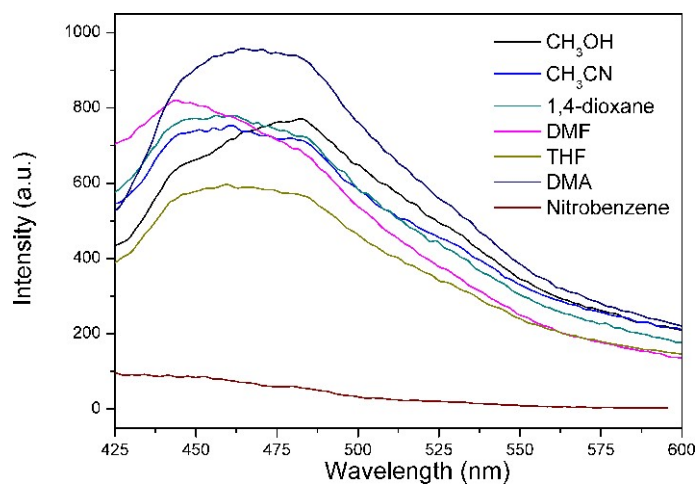

**Figure S13** The FL spectra of compound **1** dispersed in solvents and nitrobenzene.



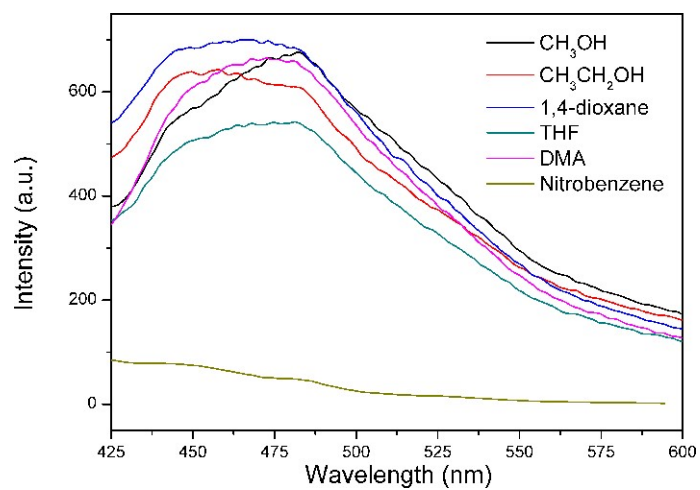

**Figure S14** The FL spectra of compound 2 dispersed in solvents and nitrobenzene.

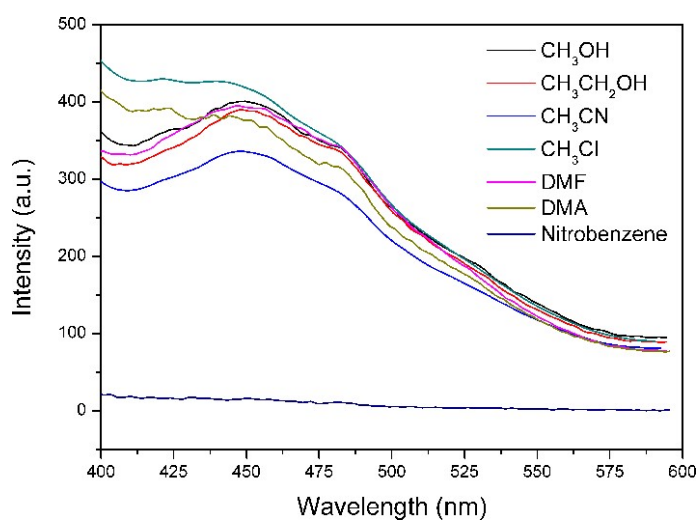

**Figure S15** The FL spectra of compound 3 dispersed in solvents and nitrobenzene.

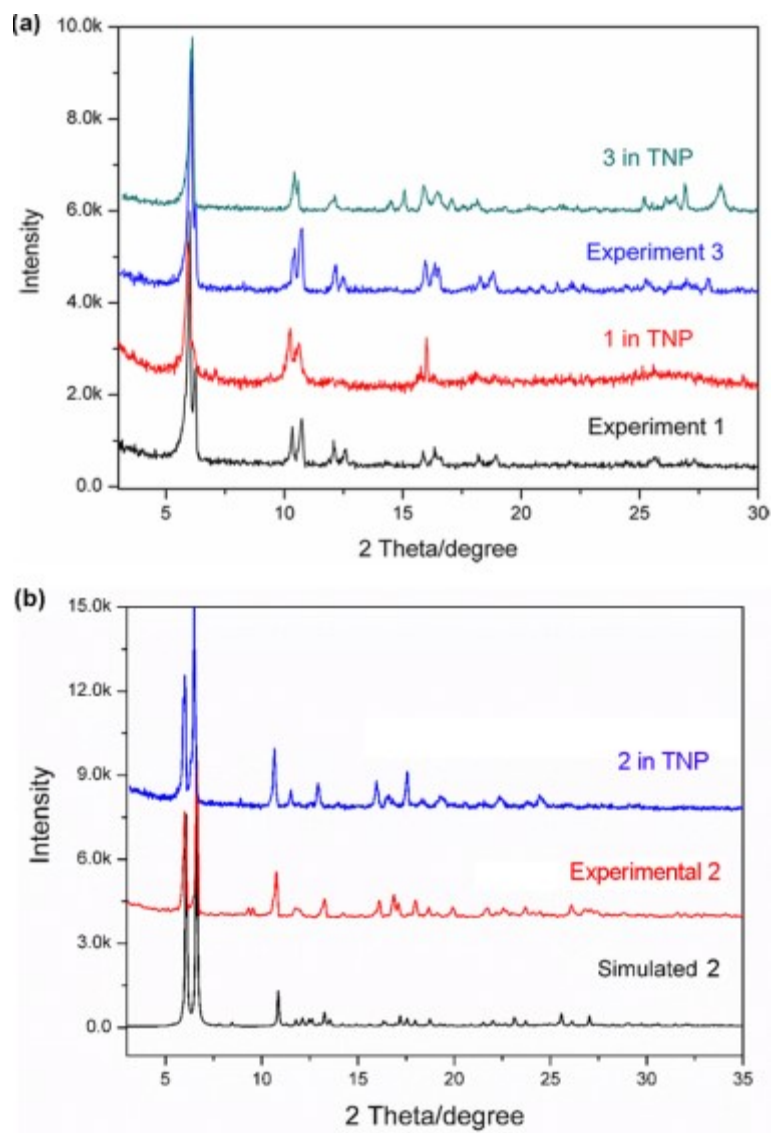

**Figure S16** PXRD for the as-made compounds before and after being immersed in  $10^{-3}$  M TNP.

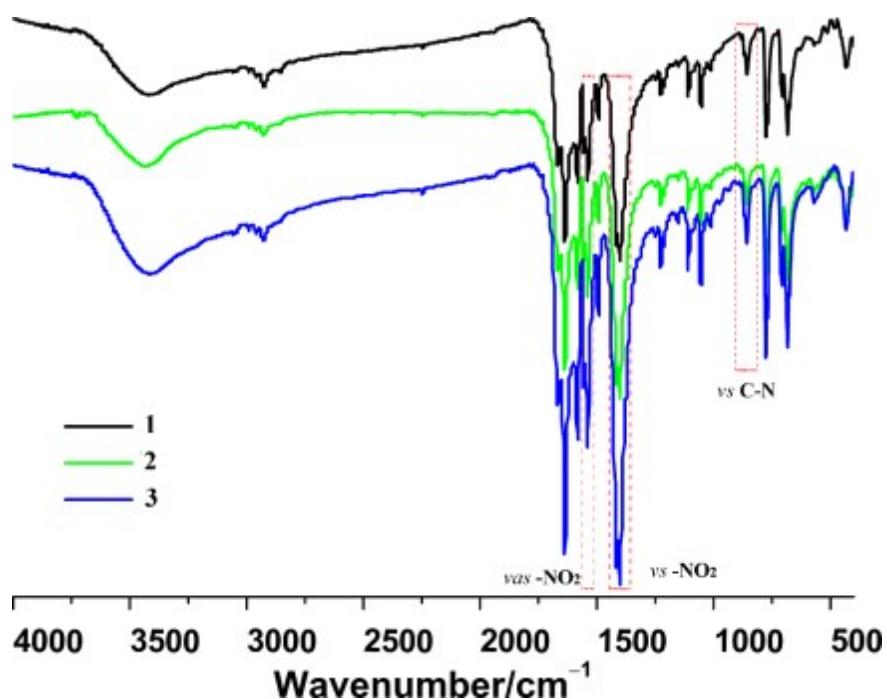

**Figure S17** The IR for the as-made compounds before and after being immersed in  $10^{-3}$  M TNP.

**Table S1** Selected MOF FL sensors towards TNP.

| Compounds                                                                                                                                                                                     | $K_{sv} / M^{-1}$     | Reference |
|-----------------------------------------------------------------------------------------------------------------------------------------------------------------------------------------------|-----------------------|-----------|
| Tb(L)(OH)                                                                                                                                                                                     | $7.73 \times 10^{-2}$ | S1        |
| Eu(BTB)H <sub>2</sub> O                                                                                                                                                                       | $6.76 \times 10^{-2}$ | S2        |
| Tb(BTB)H <sub>2</sub> O                                                                                                                                                                       | $3.25 \times 10^{-2}$ |           |
| Cd(NDC) <sub>0.5</sub> (PCA)                                                                                                                                                                  | $3.5 \times 10^4$     | S3        |
| [(CH <sub>3</sub> ) <sub>2</sub> NH <sub>2</sub> ] <sub>3</sub> [Zn <sub>4</sub> Na(BPTC) <sub>3</sub> ] <sub>3</sub> ·4CH <sub>3</sub> OH·2DMF                                               | $3.2 \times 10^4$     | S4        |
| [Zn(NDC)(H <sub>2</sub> O)] <sub>n</sub>                                                                                                                                                      | $6 \times 10^4$       | S5        |
| [Cd(NDC)(H <sub>2</sub> O)] <sub>n</sub>                                                                                                                                                      | $2.385 \times 10^4$   |           |
| {[Tb(L) <sub>1.5</sub> (H <sub>2</sub> O)]·3H <sub>2</sub> O} <sub>n</sub>                                                                                                                    | $7.47 \times 10^4$    | S6        |
| Zr <sub>6</sub> O <sub>4</sub> (OH) <sub>6</sub> (L) <sub>6</sub>                                                                                                                             | $2.9 \times 10^4$     | S7        |
| Eu <sub>3</sub> (L) <sub>3</sub> (HCOO)(μ <sub>3</sub> -OH) <sub>2</sub> (H <sub>2</sub> O)                                                                                                   | $2.1 \times 10^4$     | S8        |
| Zn <sub>8</sub> (ad) <sub>4</sub> (BPDC) <sub>6</sub> O·2Me <sub>2</sub> NH <sub>2</sub>                                                                                                      | $4.6 \times 10^4$     | S9        |
| Zr <sub>6</sub> O <sub>4</sub> (OH) <sub>6</sub> (L) <sub>6</sub>                                                                                                                             | $5.8 \times 10^4$     | S10       |
| [Cd(NDC)L] <sub>2</sub> ·H <sub>2</sub> O                                                                                                                                                     | $3.7 \times 10^4$     | S11       |
| Zn <sub>4</sub> (DMF)(Ur) <sub>2</sub> (NDC) <sub>4</sub>                                                                                                                                     | $10.83 \times 10^4$   | S12       |
| [{Zn(BINDI) <sub>0.5</sub> (bpa) <sub>0.5</sub> (H <sub>2</sub> O)} <sub>3</sub> ·4H <sub>2</sub> O] <sub>n</sub> (MOF1)                                                                      | $4.9 \times 10^4$     | S13       |
| [{Zn(BINDI) <sub>0.5</sub> (bpe)} <sub>3</sub> ·3H <sub>2</sub> O] <sub>n</sub> (MOF2)                                                                                                        | $1.29 \times 10^4$    |           |
| Cu-CIP                                                                                                                                                                                        | $1.07 \times 10^4$    | S14       |
| {Mn(Tipp)(A) <sub>2</sub> } <sub>n</sub> ·2H <sub>2</sub> O                                                                                                                                   | $11.8 \times 10^4$    | S15       |
| {(Me <sub>2</sub> NH <sub>2</sub> ) <sub>4</sub> [Eu <sub>4</sub> (DDAC) <sub>3</sub> (HCO <sub>2</sub> )(OH <sub>2</sub> ) <sub>2</sub> ] <sub>3</sub> ·8DMF·9H <sub>2</sub> O} <sub>n</sub> | $8.6 \times 10^4$     | S16       |
| [Zn <sub>3</sub> (TIAB) <sub>2</sub> (IMDC) <sub>2</sub> ] <sub>3</sub> ·(NO <sub>3</sub> ) <sub>2</sub> ·(DMF) <sub>2</sub> ·(H <sub>2</sub> O) <sub>2</sub>                                 | $5.68 \times 10^4$    | S17       |
| [Zn(bipa)(suc)] <sub>n</sub>                                                                                                                                                                  | $6.48 \times 10^4$    | S18       |

## References:

- S1. J. Qin, B. Ma, X.-F. Liu, H.-L. Lu, X.-Y. Dong, S.-Q. Zang and H. Hou, *J. Mater. Chem. A*, 2015, **3**, 12690.
- S2. J.-H. Qin, B. Ma, X.-F. Liu, H.-L. Lu, X.-Y. Dong, S.-Q. Zang and H. Hou, *Dalton Trans.*, 2015, **44**, 14594.
- S3. S. S. Nagarkar, B. Joarder, A. K. Chaudhari, S. Mukherjee and S. K. Ghosh, *Angew. Chem. Int. Ed.*, 2013, **52**, 2881.
- S4. E.-L. Zhou, P. Huang, C. Qin, K.-Z. Shao and Z.-M. Su, *J. Mater. Chem. A*, 2015, **3**, 7224.
- S5. P. Ghosh, S. K. Saha, A. Roychowdhury and P. Banerjee, *Eur. J. Inorg. Chem.*, 2015, 2851.
- S6. L.-H. Cao, F. Shi, W.-M. Zhang, S.-Q. Zang and T. C. W. Mak, *Chem. Eur. J.*, 2015, **21**, 15705.
- S7. S. S. Nagarkar, A. V. Desai and S. K. Ghosh, *Chem. Commun.*, 2014, **50**, 8915.
- S8. X.-Z. Song, S.-Y. Song, S.-N. Zhao, Z.-M. Hao, M. Zhu, X. Meng, L.-L. Wu and H.-J. Zhang, *Adv. Funct. Mater.*, 2014, **24**, 4034.
- S9. B. Joarder, A. V. Desai, P. Samanta, S. Mukherjee and S. K. Ghosh, *Chem. Eur. J.*, 2015, **21**, 965.
- S10. S. S. Nagarkar, A. V. Desai, P. Samanta and S. K. Ghosh, *Dalton Trans.*, 2015, **44**, 15175.
- S11. B.-Q. Song, C. Qin, Y.-T. Zhang, X.-S. Wu, L. Yang, K.-Z. Shao and Z.-M. Su, *Dalton Trans.*, 2015, **44**, 18386.
- S12. S. Mukherjee, A. V. Desai, B. Manna, A. I. Inamdar and S. K. Ghosh, *Cryst. Growth. Des.*, 2015, **15**, 4627.
- S13. S. S. Dhankhar, N. Sharma and C. M. Nagaraja, *Inorg. Chem. Front.*, 2019, **6**, 1058.
- S14. M. Kaur, M. Yusuf and A. K. Malik, *J. Fluores.*, 2021, **31**, 1959.
- S15. Y. Zou, K. Huang, X. Zhang, D. Qin and B. Zhao, *Inorg. Chem.*, 2021, **60**, 11222.
- S16. H. Chen, Z. Zhang, T. Hu and X. Zhang, *Inorg. Chem. Front.*, 2021, **8**, 4376.
- S17. Y. Liu, Y. Wang, Y. Zhang, P. G. Karmaker, L. Zhang, F. Huo, X. Yang and B. Zhao, *Dyes and Pigments*, 2022, **199**, 110099.
- S18. S.-S. Ge, Y.-H. Zhang, X.-Q. Yang and X.-G. Mu, *Transition Metal Chem.*, 2023, **48**, 37.

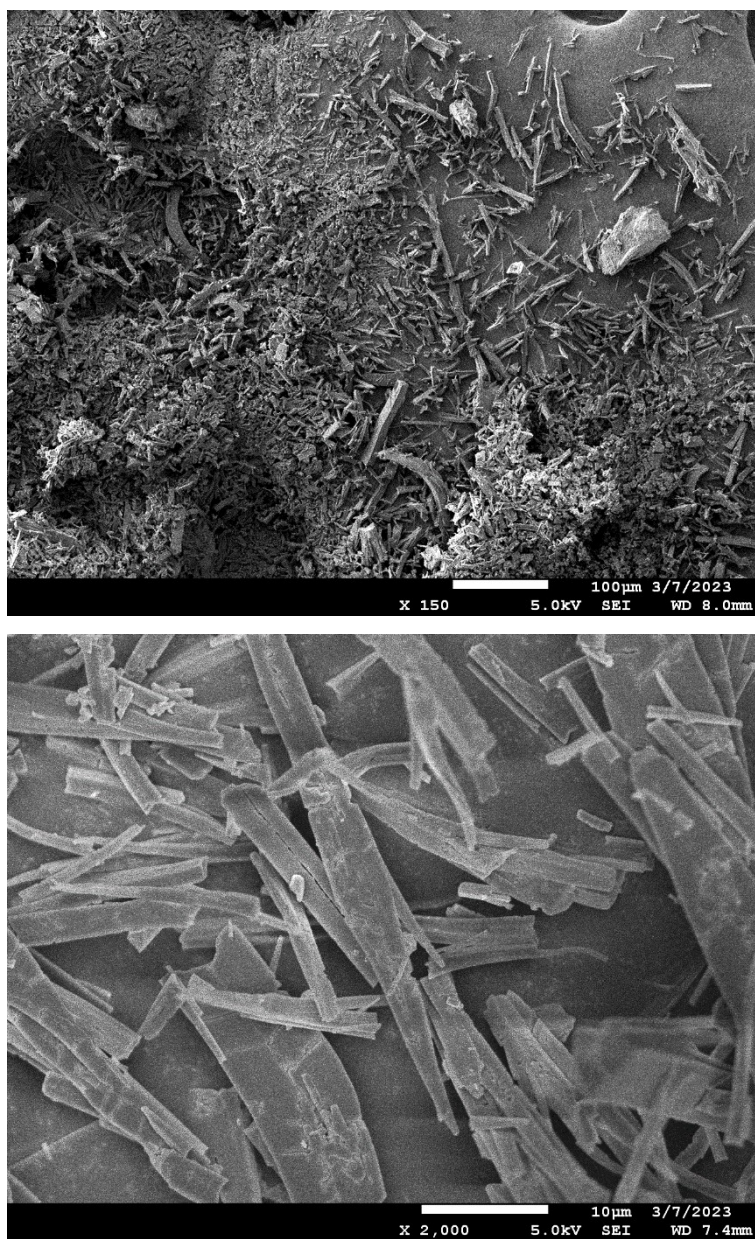

**Figure S18** The SEM photographs for the as-made compound **2** before (up) and after (down) immersing treatment in  $10^{-3}$  M TNP.

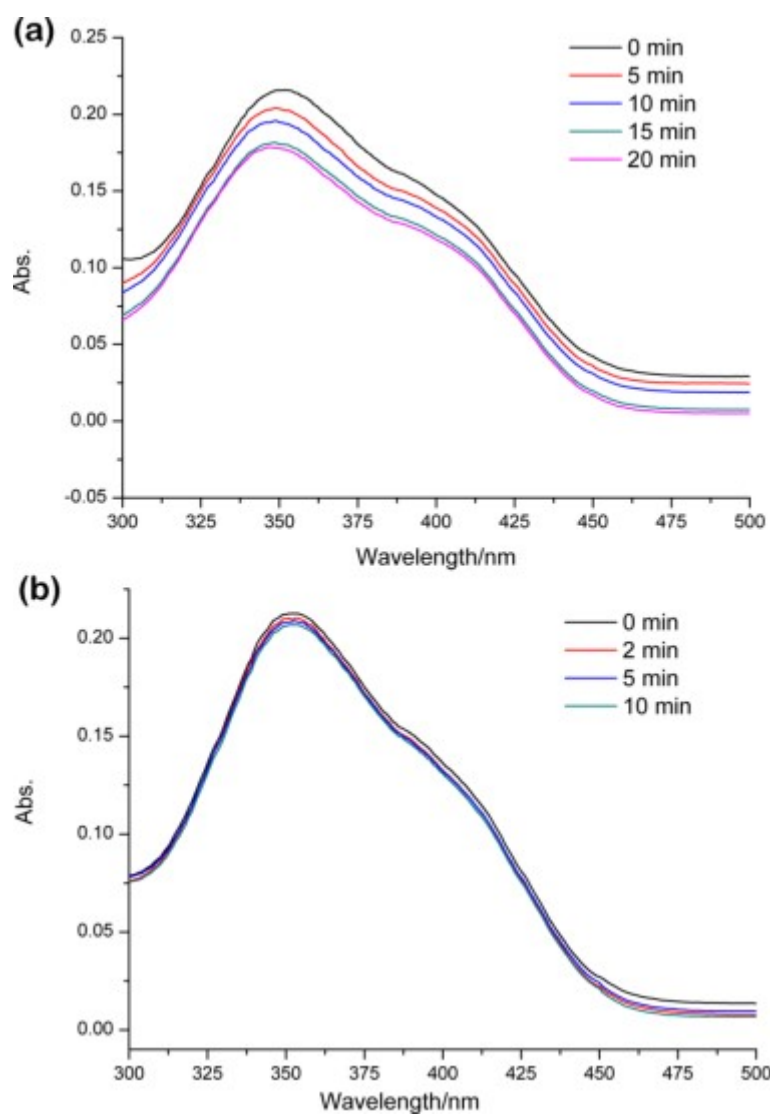

**Figure S19** The time-dependent absorption spectra for compounds **1** (a) and **3** (b) that dispersed in  $0.5 \times 10^{-4}$  M TNP.
